# Supplementary material for: Modelling of amino acid turnover in the horse during training and racing: A basis for developing a novel supplementation strategy
Source: PLOS journal article supplement (doi:10.1371/journal.pone.0226988), 2020-01-03
Supplement: S4 (10.1371/journal.pone.0226988.s004) [file journal.pone.0226988.s004]

**S4 Table. The adjusted nitrogen balances generated from the model under recommended feeding regime of 1.72g/Kg BW/day compared with double this rate at 3.0g/Kg BW/day for a 500Kg horse where the animal was undertaking a heavy work load and the protein turnover rate was 4 g/kg/day.**

| Amino acid    | Adjusted<br>nitrogen<br>balance<br><br>Protein intake<br>1.7g/Kg<br>BW/day<br><br>g | Adjusted<br>nitrogen<br>balance<br><br>Protein intake<br>3.0g/Kg<br>BW/day<br><br>g |
|---------------|-------------------------------------------------------------------------------------|-------------------------------------------------------------------------------------|
| Histidine     | 2.5                                                                                 | 4.1                                                                                 |
| Serine        | -3.0                                                                                | 0.3                                                                                 |
| Glycine       | 1.8                                                                                 | 5.3                                                                                 |
| Ornithine     | -3.4                                                                                | -3.4                                                                                |
| Lysine        | 5.5                                                                                 | 8.0                                                                                 |
| Threonine     | 3.4                                                                                 | 5.9                                                                                 |
| Valine        | 5.5                                                                                 | 9.0                                                                                 |
| Leucine       | 17.4                                                                                | 22.9                                                                                |
| Isoleucine    | 2.9                                                                                 | 5.6                                                                                 |
| Glx           | -5.7                                                                                | 7.5                                                                                 |
| Aspartic acid | 12.4                                                                                | 19.7                                                                                |
| Methionine    | 2.2                                                                                 | 3.2                                                                                 |
| Tyrosine      | 4.2                                                                                 | 6.5                                                                                 |
| Phenylalanine | 6.7                                                                                 | 10.1                                                                                |
| Proline       | 15.6                                                                                | 23.3                                                                                |
| Alanine       | 9.4                                                                                 | 13.8                                                                                |
